# Supplementary material for: Semecarpus Anacardium Linn. Leaf Extract Exhibits Activities Against Breast Cancer And Prolongs The Survival of Tumor Bearing Mice
Source: Research Square preprint supplement (doi:10.21203/rs.3.rs-655078/v1), 2021-07-16
Supplement: Supplementary file 1 [file b445c3bc548123bfa36feef8.docx]

**SUPPLEMENTARY DATA**

**Supplementary methods**

**Evaluation of the oral acute toxicity**

The evaluation of oral acute toxicity was carried out as per the Organization for Economical Cooperation and Development (OECD test 425) described procedure. Total 18 mice of either sex were divided into three groups (3 male & 3 female in each group) randomly *viz.* experimental groups 1 & 2 and control group 3 respectively. A day before an experiment, animals were kept on fasting. Next day, the ethyl acetate extract was administered orally using a 16G oral round ball tip feeding curved needles to the mice of the experimental groups. A single dose of 2000 mg/kg and 5000 mg/kg body weight were administrated among the mice of experimental group 1 and 2 respectively, while distilled water was administrated to the mice of control group. All mice were observed individually after first 30 min dosing, special attention was given during the first 4 h and followed up from 24 h to 14th day of the dosing to collect signs and symptoms of toxicity [54, 55]. The attention was paid to investigate the potential occurrence of tremors, convulsions, salivation, diarrhea, lethargy and drowsiness. Live weight of the animals was monitored on days 0, 7 and 14 of the dosing as one of the toxicity parameters. At the end of the experiment, the animals were sacrificed by cervical dislocation of anaesthetised animals and the organs *viz.* brain, stomach, liver, spleen, lungs, kidneys, muscles, esophagus and small intestine were collected to evaluate histopathological changes.

**Tumor model development**

EAC cell induced tumor model was chosen for this study, as it is of mouse origin and can be easily transplanted in immunocompetent mouse. The EAC cells were harvested from 75 cm2 cell culture flask with 70-80% cell confluence by trypsinization and followed by centrifugation at 750 rpm (Remi R8C) for 5 min. The harvested cells were diluted in 10 mM phosphate buffered saline (1X PBS) at a density of 5 × 106 cells, and 200 µl of viable cell solution were injected into the peritoneal cavity of each recipient mouse of 21±1 g body weight and allowed to multiply. The EAC cells were withdrawn from peritoneal cavity of the donor mice after 8–10 days of inoculation and diluted in 1X PBS and centrifuged at 750 rpm (Remi R8C) for 5 minutes and the cell pellet was resuspended in sterile 10 mM PBS which was injected (100 µl at 1 × 107 cells/ml) in left thigh of female mice for developing solid tumor [51, 56].

**Pilot study for effective dose determination**

After 4 days of EAC inoculation, a pilot study was set up for determination of effective dose in EAC induced tumor-bearing mice which were divided into four groups of 3 mice in each. The tumor-bearing mice were administered 200, 100 and 50 mg/kg body weight of ethyl extract of test drug in group 1, 2 and 3 respectively while100 µl distilled water was given to the mice of group 4 named as control once daily for 14 days [53] along with normal diet and water *ad libitum*. At the end of 14th days, the mice were sacrificed and tumors were dissected out for their volume calculation. Tumor size was measured by Vernier calipers using the formula V = 0.5 × a × b2, where ‘a' and ‘b' indicates the major and minor diameter, respectively.

**Supplement table 1**

Selective index of different extracts against cancer cell lines.

| **Selective Index** | **MCF-7** | **MDA-231** | **HCT-15** | **MIN6** | **EAC** | **L929** |
| --- | --- | --- | --- | --- | --- | --- |
| **BLPE** | 14.92 | 5.07 | 4.69 | 24.61 | 3.79 | 1.00 |
| **BLEA** | **52.17** | 2.36 | 4.45 | 1.88 | 17.37 | 1.00 |
| **BLM** | 17.96 | 3.13 | 1.11 | 0.40 | 1.36 | 1.00 |

**Supplement table 2**

Observational study for BLEA oral toxicity in mice (OECD test 425).

| **Observation** | 0 h | | 0.5 h | | 1 h | | 2 h | | 4 h | | 24 h | | 14th day | |
| --- | --- | --- | --- | --- | --- | --- | --- | --- | --- | --- | --- | --- | --- | --- |
| D1 | D2 | D1 | D2 | D1 | D2 | D1 | D2 | D1 | D2 | D1 | D2 | D1 | D2 |
| **Skin & fur** | N | N | N | N | N | N | N | N | N | N | N | N | N | N |
| **Mucous membrane** | N | N | N | N | N | N | N | N | N | N | N | N | N | N |
| **Tremors** | N | N | N | N | N | N | N | N | N | N | N | N | N | N |
| **Convulsion** | N | N | N | N | N | N | N | N | N | N | N | N | N | N |
| **Salivation** | N | N | N | N | N | N | N | N | N | N | N | N | N | N |
| **Diarrhea** | N | N | N | N | N | N | N | N | N | N | N | N | N | N |
| **Sleep** | N | N | N | N | Y | Y | N | Y | N | N | N | N | N | N |
| **Coma** | N | N | N | N | N | N | N | N | N | N | N | N | N | N |
| **Lethargy** | N | N | N | N | N | N | N | N | N | N | N | N | N | N |
| **Mortality** | N | N | N | N | N | N | N | N | N | N | N | N | N | N |

**References**

1. Lam F, Ervik M, Ferlay J, Soerjomataram I, Mery L, B. F. (2018). World Source: Globocan 2018, *876*, 1–2. Retrieved from http://gco.iarc.fr/today/data/factsheets/populations/900-world-fact-sheets.pdf

2. Arya, R. K., Singh, A., Yadav, N. K., Cheruvu, S. H., Hossain, Z., Meena, S., … Datta, D. (2015). Anti-breast tumor activity of Eclipta extract in-vitro and in-vivo: novel evidence of endoplasmic reticulum specific localization of Hsp60 during apoptosis. *Scientific Reports*, *5*, 18457. doi:10.1038/srep18457

3. Vijayalakshmi, T., Muthulakshmi, V., & Sachdanandam, P. (1997). Effect of milk extract of Semecarpus anacardium nuts on glycohydrolases and lysosomal stability in adjuvant arthritis in rats. *Journal of ethnopharmacology*, *58*(1), 1–8.

4. Vijayalakshmi, T., Muthulakshmi, V., & Sachdanandam, P. (2000). Toxic studies on biochemical parameters carried out in rats with Serankottai nei, a siddha drug-milk extract of Semecarpus anacardium nut. *Journal of ethnopharmacology*, *69*(1), 9–15.

5. Kim, J. H., Kismali, G., & Gupta, S. C. (2018). Natural Products for the Prevention and Treatment of Chronic Inflammatory Diseases: Integrating Traditional Medicine into Modern Chronic Diseases Care. *Evidence-based complementary and alternative medicine : eCAM*. United States. doi:10.1155/2018/9837863

6. Joshi, K., Ghodke, Y., & Shintre, P. (2010). Traditional medicine and genomics. *Journal of Ayurveda and integrative medicine*, *1*(1), 26–32. doi:10.4103/0975-9476.59824

7. Patwardhan, B., & Vaidya, A. D. B. (2010). Natural products drug discovery: accelerating the clinical candidate development using reverse pharmacology approaches. *Indian journal of experimental biology*, *48*(3), 220–227.

8. Awasthee, N., Rai, V., Verma, S. S., Francis, K. S., Nair, M. S., & Gupta, S. C. (2018). Anti-cancer activities of Bharangin against breast cancer: Evidence for the role of NF-κB and lncRNAs. *Biochimica et Biophysica Acta (BBA) - General Subjects*, *1862*(12), 2738–2749. doi:https://doi.org/10.1016/j.bbagen.2018.08.016

9. Gupta, S. C., Prasad, S., Tyagi, A. K., Kunnumakkara, A. B., & Aggarwal, B. B. (2017). Neem (Azadirachta indica): An indian traditional panacea with modern molecular basis. *Phytomedicine*, *34*, 14–20. doi:https://doi.org/10.1016/j.phymed.2017.07.001

10. Pandey, M. K., Gupta, S. C., Nabavizadeh, A., & Aggarwal, B. B. (2017). Regulation of cell signaling pathways by dietary agents for cancer prevention and treatment. *Seminars in cancer biology*, *46*, 158–181. doi:10.1016/j.semcancer.2017.07.002

11. Mathivadhani, P., Shanthi, P., & Sachdanandam, P. (2007). Effect of Semecarpus anacardium Linn. nut extract on mammary and hepatic expression of xenobiotic enzymes in DMBA-induced mammary carcinoma. *Environmental toxicology and pharmacology*, *23*(3), 328–334. doi:10.1016/j.etap.2006.12.004

12. Semalty, M., Semalty, A., Badola, A., Joshi, G. P., & Rawat, M. S. M. (2010). Semecarpus anacardium Linn.: A review. *Pharmacognosy Reviews*. India. doi:10.4103/0973-7847.65328

13. Sharma, A., Mathur, R., & Dixit, V. P. (1995). Hypocholesterolemic activity of nut shell extract of Semecarpus anacardium (Bhilawa) in cholesterol fed rabbits. *Indian journal of experimental biology*, *33*(6), 444–448.

14. Selvam, C., Jachak, S. M., & Bhutani, K. K. (2004). Cyclooxygenase inhibitory flavonoids from the stem bark of Semecarpus anacardium Linn. *Phytotherapy research : PTR*, *18*(7), 582–584. doi:10.1002/ptr.1492

15. Nair, P. K. R., Melnick, S. J., Wnuk, S. F., Rapp, M., Escalon, E., & Ramachandran, C. (2009). Isolation and characterization of an anticancer catechol compound from Semecarpus anacardium. *Journal of ethnopharmacology*, *122*(3), 450–456. doi:10.1016/j.jep.2009.02.001

16. Adhami, H. R., Linder, T., Kaehlig, H., Schuster, D., Zehl, M., & Krenn, L. (2012). Catechol alkenyls from Semecarpus anacardium: acetylcholinesterase inhibition and binding mode predictions. *Journal of ethnopharmacology*, *139*(1), 142–148. doi:10.1016/j.jep.2011.10.032

17. Llanchezhian, R., Joseph C, R., & Rabinarayan, A. (2012). Urushiol-induced contact dermatitis caused during Shodhana (purificatory measures) of Bhallataka (Semecarpus anacardium Linn.) fruit. *Ayu*, *33*(2), 270–273. doi:10.4103/0974-8520.105250

18. Singh, R. K., Ranjan, A., Srivastava, A. K., Singh, M., Shukla, A. K., Atri, N., … Singh, S. K. (2019). Cytotoxic and apoptotic inducing activity of Amoora rohituka leaf extracts in human breast cancer cells. *Journal of Ayurveda and Integrative Medicine*. doi:https://doi.org/10.1016/j.jaim.2018.12.005

19. Usharani, B., & Vasudevan, N. (2017). Root Exudates of Cyperus alternifolius in Partial Hydroponic Condition under Heavy Metal Stress. *Pharmacognosy research*, *9*(3), 294–300. doi:10.4103/pr.pr_107_16

20. Ibms, A. L. M. P. G., Ibms, A. L. M. P. G., & Ibms, A. L. M. P. G. (2015). formulation ) and its anticancer activity in MCF-7 cell line In vitro antioxidant potential of Shemamruthaa ( a herbal formulation ) and its anticancer activity in MCF-7 cell line Nandhakumar Elumalai a , Purushothaman Ayyakkannu a , Shanthi Palanivelu b .

21. Fitriani, A., Ihsan, F., & Hamdiyati, Y. (2015). Antibacteria Activity of Shewanella and Pseudomonas as Endophytic Bacteria from the Root of Ageratum conyzoides L ., (June).

22. Singh, M., Singh, R. K., Singh, S. K., Mahto, S. K., & Misra, N. (2018). In vitro biocompatibility analysis of functionalized poly(vinyl chloride)/layered double hydroxide nanocomposites. *RSC Advances*, *8*(71), 40611–40620. doi:10.1039/C8RA06175K

23. Srivastava, M., Hegde, M., Chiruvella, K. K., Koroth, J., Bhattacharya, S., Choudhary, B., & Raghavan, S. C. (2014). Sapodilla plum (Achras sapota) induces apoptosis in cancer cell lines and inhibits tumor progression in mice. *Scientific reports*, *4*, 6147. doi:10.1038/srep06147

24. Thomas, E., Gopalakrishnan, V., Somasagara, R. R., Choudhary, B., & Raghavan, S. C. (2016). Extract of Vernonia condensata, Inhibits Tumor Progression and Improves Survival of Tumor-allograft Bearing Mouse. *Scientific reports*, *6*, 23255. doi:10.1038/srep23255

25. Daina, A., Michielin, O., & Zoete, V. (2017). SwissADME : a free web tool to evaluate pharmacokinetics , drug- likeness and medicinal chemistry friendliness of small molecules. *Nature Publishing Group*, (January), 1–13. doi:10.1038/srep42717

26. Baell, J., Congreve, M., Leeson, P., & Abad-Zapatero, C. (2013, May). Ask the experts: past, present and future of the rule of five. *Future medicinal chemistry*. England. doi:10.4155/fmc.13.61

27. Ronchi, V. P., Kim, E. D., Summa, C. M., Klein, J. M., & Haas, A. L. (2017). In silico modeling of the cryptic E2 approximately ubiquitin-binding site of E6-associated protein (E6AP)/UBE3A reveals the mechanism of polyubiquitin chain assembly. *The Journal of biological chemistry*, *292*(44), 18006–18023. doi:10.1074/jbc.M117.813477

28. Mfotie Njoya, E., Munvera, A. M., Mkounga, P., Nkengfack, A. E., & McGaw, L. J. (2017). Phytochemical analysis with free radical scavenging, nitric oxide inhibition and antiproliferative activity of Sarcocephalus pobeguinii extracts. *BMC Complementary and Alternative Medicine*, *17*(1), 199. doi:10.1186/s12906-017-1712-5

29. Mathivadhani, P., Shanthi, P., & Sachdanandam, P. (2007). Effect of Semecarpus anacardium nut extract on ECM and proteases in mammary carcinoma rats. *Vascular pharmacology*, *46*(6), 419–426. doi:10.1016/j.vph.2006.12.004

30. Sujatha, V., & Sachdanandam, P. (2002). Recuperative effect of Semecarpus anacardium linn. nut milk extract on carbohydrate metabolizing enzymes in experimental mammary carcinoma-bearing rats. *Phytotherapy research : PTR*, *16 Suppl 1*, S14-8.

31. Arathi, G., & Sachdanandam, P. (2003). Therapeutic effect of Semecarpus anacardium Linn. nut milk extract on carbohydrate metabolizing and mitochondrial TCA cycle and respiratory chain enzymes in mammary carcinoma rats. *The Journal of pharmacy and pharmacology*, *55*(9), 1283–1290. doi:10.1211/0022357021710

32. Mathivadhani, P., Shanthi, P., & Sachdanandam, P. (2006). Effect of Semecarpus anacardium Linn. nut milk extract on glutathione and its associated enzymes in experimentally induced mammary carcinoma. *Journal of medicinal food*, *9*(2), 265–269. doi:10.1089/jmf.2006.9.265

33. Mathivadhani, P., Shanthi, P., & Sachdanandam, P. (2007). Hypoxia and its downstream targets in DMBA induced mammary carcinoma: protective role of Semecarpus anacardium nut extract. *Chemico-biological interactions*, *167*(1), 31–40. doi:10.1016/j.cbi.2007.01.003

34. Joseph, J. P., Raval, S. K., Sadariya, K. A., Jhala, M., & Kumar, P. (2013). Anti cancerous efficacy of Ayurvedic milk extract of Semecarpus anacardium nuts on hepatocellular carcinoma in Wistar rats. *African journal of traditional, complementary, and alternative medicines : AJTCAM*, *10*(5), 299–304.

35. Mathivadhani, P., Shanthi, P., & Sachdanandam, P. (2007). Apoptotic effect of Semecarpus anacardium nut extract on T47D breast cancer cell line. *Cell biology international*, *31*(10), 1198–1206. doi:10.1016/j.cellbi.2007.04.004

36. Kumar, A. D. N., Bevara, G. B., Kaja, L. K., Badana, A. K., & Malla, R. R. (2016). Protective effect of 3-O-methyl quercetin and kaempferol from Semecarpus anacardium against H2O2 induced cytotoxicity in lung and liver cells. *BMC complementary and alternative medicine*, *16*(1), 376. doi:10.1186/s12906-016-1354-z

37. Hanahan, D., & Weinberg, R. A. (2011). Hallmarks of cancer: the next generation. *Cell*, *144*(5), 646–674. doi:10.1016/j.cell.2011.02.013

38. Singh, S., Sharma, B., Kanwar, S. S., & Kumar, A. (2016). Lead Phytochemicals for Anticancer Drug Development. *Frontiers in plant science*, *7*, 1667. doi:10.3389/fpls.2016.01667

39. Vijayarathna, S., Chen, Y., Kanwar, J. R., & Sasidharan, S. (2017). Standardized Polyalthia longifolia leaf extract (PLME) inhibits cell proliferation and promotes apoptosis: The anti-cancer study with various microscopy methods. *Biomedicine & pharmacotherapy = Biomedecine & pharmacotherapie*, *91*, 366–377. doi:10.1016/j.biopha.2017.04.112

40. Mallick, N., Singh, M., Parveen, R., Khan, W., Ahmad, S., Najm, M. Z., & Husain, S. A. (2015). HPTLC Analysis of Bioactivity Guided Anticancer Enriched Fraction of Hydroalcoholic Extract of Picrorhiza kurroa, *2015*. doi:10.1155/2015/513875

41. Ramya, P. V. S., Guntuku, L., Angapelly, S., Digwal, C. S., Lakshmi, U. J., Sigalapalli, D. K., … Kamal, A. (2018). Synthesis and biological evaluation of curcumin inspired imidazo[1,2-a]pyridine analogues as tubulin polymerization inhibitors. *European journal of medicinal chemistry*, *143*, 216–231. doi:10.1016/j.ejmech.2017.11.010

42. Krishnan, P., Rajan, M., Kumari, S., Sakinah, S., Priya, S. P., Amira, F., … Kumar, S. S. (2017). Efficiency of newly formulated camptothecin with beta-cyclodextrin-EDTA-Fe3O4 nanoparticle-conjugated nanocarriers as an anti-colon cancer (HT29) drug. *Scientific reports*, *7*(1), 10962. doi:10.1038/s41598-017-09140-1

43. Gao, L., Wang, K.-X., Zhou, Y.-Z., Fang, J.-S., Qin, X.-M., & Du, G.-H. (2018). Uncovering the anticancer mechanism of Compound Kushen Injection against HCC by integrating quantitative analysis, network analysis and experimental validation. *Scientific reports*, *8*(1), 624. doi:10.1038/s41598-017-18325-7

44. Jiang, Z., Qian, J., Dong, H., Yang, J., Yu, X., Chen, J., … Jia, L. (2017). The traditional Chinese medicine Achyranthes bidentata and our de novo conception of its metastatic chemoprevention: from phytochemistry to pharmacology. *Scientific reports*, *7*(1), 3888. doi:10.1038/s41598-017-02054-y

45. Liang, F., Han, Y., Gao, H., Xin, S., Chen, S., Wang, N., … Li, S. (2015). Kaempferol Identified by Zebrafish Assay and Fine Fractionations Strategy from Dysosma versipellis Inhibits Angiogenesis through VEGF and FGF Pathways. *Scientific reports*, *5*, 14468. doi:10.1038/srep14468

46. Schulze-Gahmen, U., Brandsen, J., Jones, H. D., Morgan, D. O., Meijer, L., Vesely, J., & Kim, S. H. (1995). Multiple modes of ligand recognition: crystal structures of cyclin-dependent protein kinase 2 in complex with ATP and two inhibitors, olomoucine and isopentenyladenine. *Proteins*, *22*(4), 378–391. doi:10.1002/prot.340220408

47. Lapenna, S., & Giordano, A. (2009). Cell cycle kinases as therapeutic targets for cancer. *Nature reviews. Drug discovery*, *8*(7), 547–566. doi:10.1038/nrd2907

48. Sundaram, R., Karuppaiah, M., Shanthi, P., & Sachdanandam, P. (2018). Acute and sub acute studies of catechol derivatives from Semecarpus anacardium. *Toxicology reports*, *5*, 231–239. doi:10.1016/j.toxrep.2018.01.004

49. Patwardhan, B., Saraf, M. N., & David, S. B. (1988). Toxicity of semecarpus anacardium extract. *Ancient science of life*, *8*(2), 106–109.

50. Maurya, S. K., Seth, A., Laloo, D., Singh, N. K., Gautam, D. N. S., & Singh, A. K. (2015). Śodhana: An Ayurvedic process for detoxification and modification of therapeutic activities of poisonous medicinal plants. *Ancient Science of Life*. India. doi:10.4103/0257-7941.160862

51. Mishra, S., Tamta, A. K., Sarikhani, M., Desingu, P. A., Kizkekra, S. M., Pandit, A. S., … Sundaresan, N. R. (2018). Subcutaneous Ehrlich Ascites Carcinoma mice model for studying cancer-induced cardiomyopathy. *Scientific reports*, *8*(1), 5599. doi:10.1038/s41598-018-23669-9

52. Ezzat, S. M., Shouman, S. A., Elkhoely, A., Attia, Y. M., Elsesy, M. S., El Senousy, A. S., … El Tanbouly, N. (2018). Anticancer potentiality of lignan rich fraction of six Flaxseed cultivars. *Scientific Reports*, *8*(1), 544. doi:10.1038/s41598-017-18944-0

53. Srivastava, M., Hegde, M., Chiruvella, K. K., Koroth, J., Bhattacharya, S., Choudhary, B., & Raghavan, S. C. (2014). Sapodilla plum (Achras sapota) induces apoptosis in cancer cell lines and inhibits tumor progression in mice. *Scientific reports*, *4*, 6147. doi:10.1038/srep06147

54. Sreeja, P. S., Arunachalam, K., Martins, D. T. de O., Lima, J. C. da S., Balogun, S. O., Pavan, E., … Parimelazhagan, T. (2018). Sphenodesme involucrata var. paniculata (C.B. Clarke) Munir.: Chemical characterization, anti-nociceptive and anti-inflammatory activities of methanol extract of leaves. *Journal of ethnopharmacology*, *225*, 71–80. doi:10.1016/j.jep.2018.06.035

55. Amelo, W., Nagpal, P., & Makonnen, E. (2014). Antiplasmodial activity of solvent fractions of methanolic root extract of Dodonaea angustifolia in Plasmodium berghei infected mice. *BMC complementary and alternative medicine*, *14*, 462. doi:10.1186/1472-6882-14-462

56. Bhattacharjee, A., Basu, A., Biswas, J., Sen, T., & Bhattacharya, S. (2017). Chemoprotective and chemosensitizing properties of selenium nanoparticle (Nano-Se) during adjuvant therapy with cyclophosphamide in tumor-bearing mice. *Molecular and cellular biochemistry*, *424*(1–2), 13–33. doi:10.1007/s11010-016-2839-2


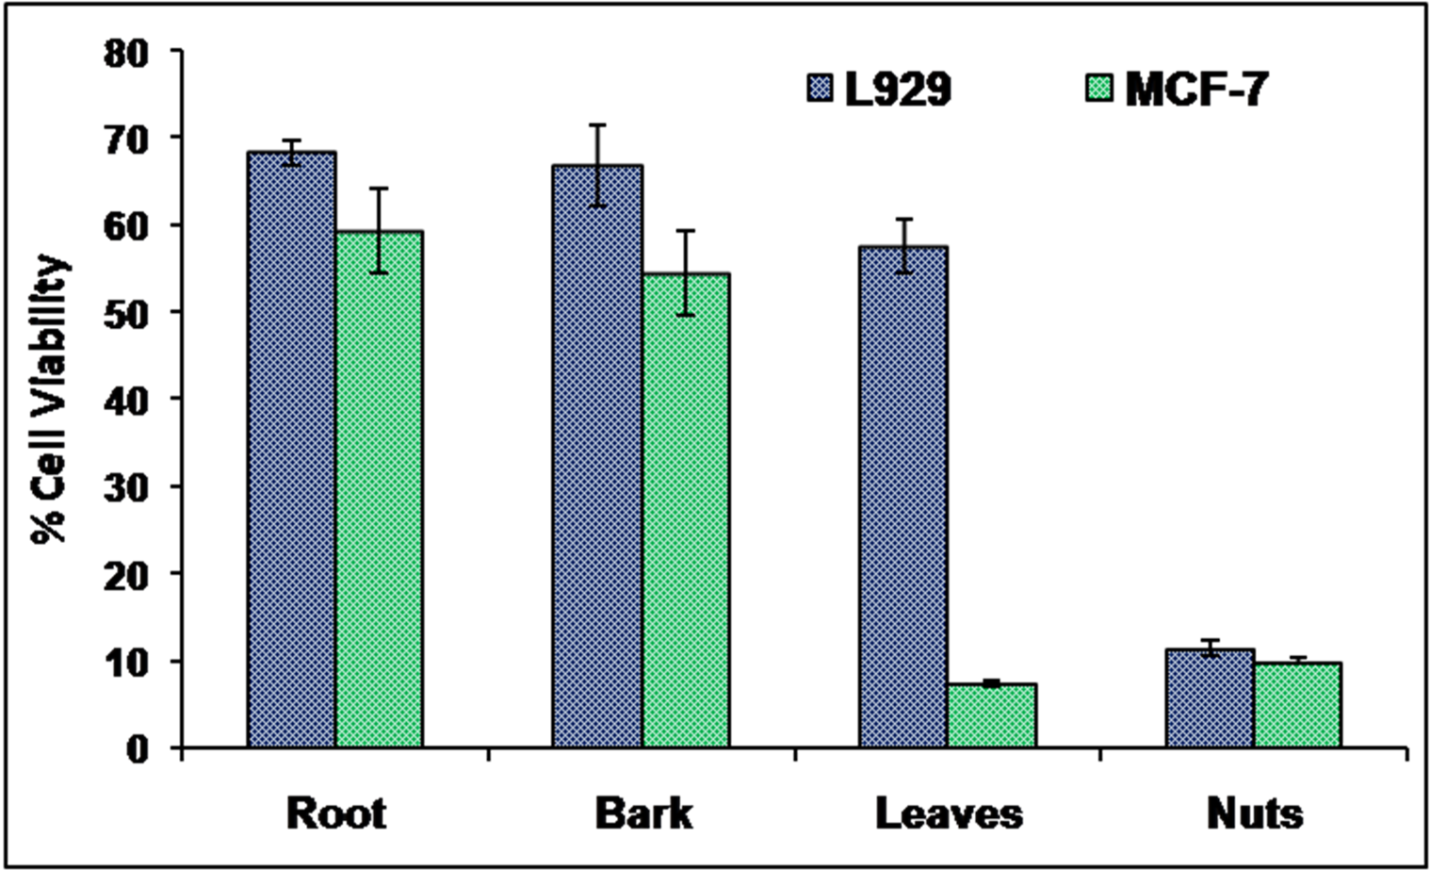


**Supplement figure 1**: the cytotoxicity of root, bark, leave and fruits in cancer cells (MCF-7) and normal cells (L929).


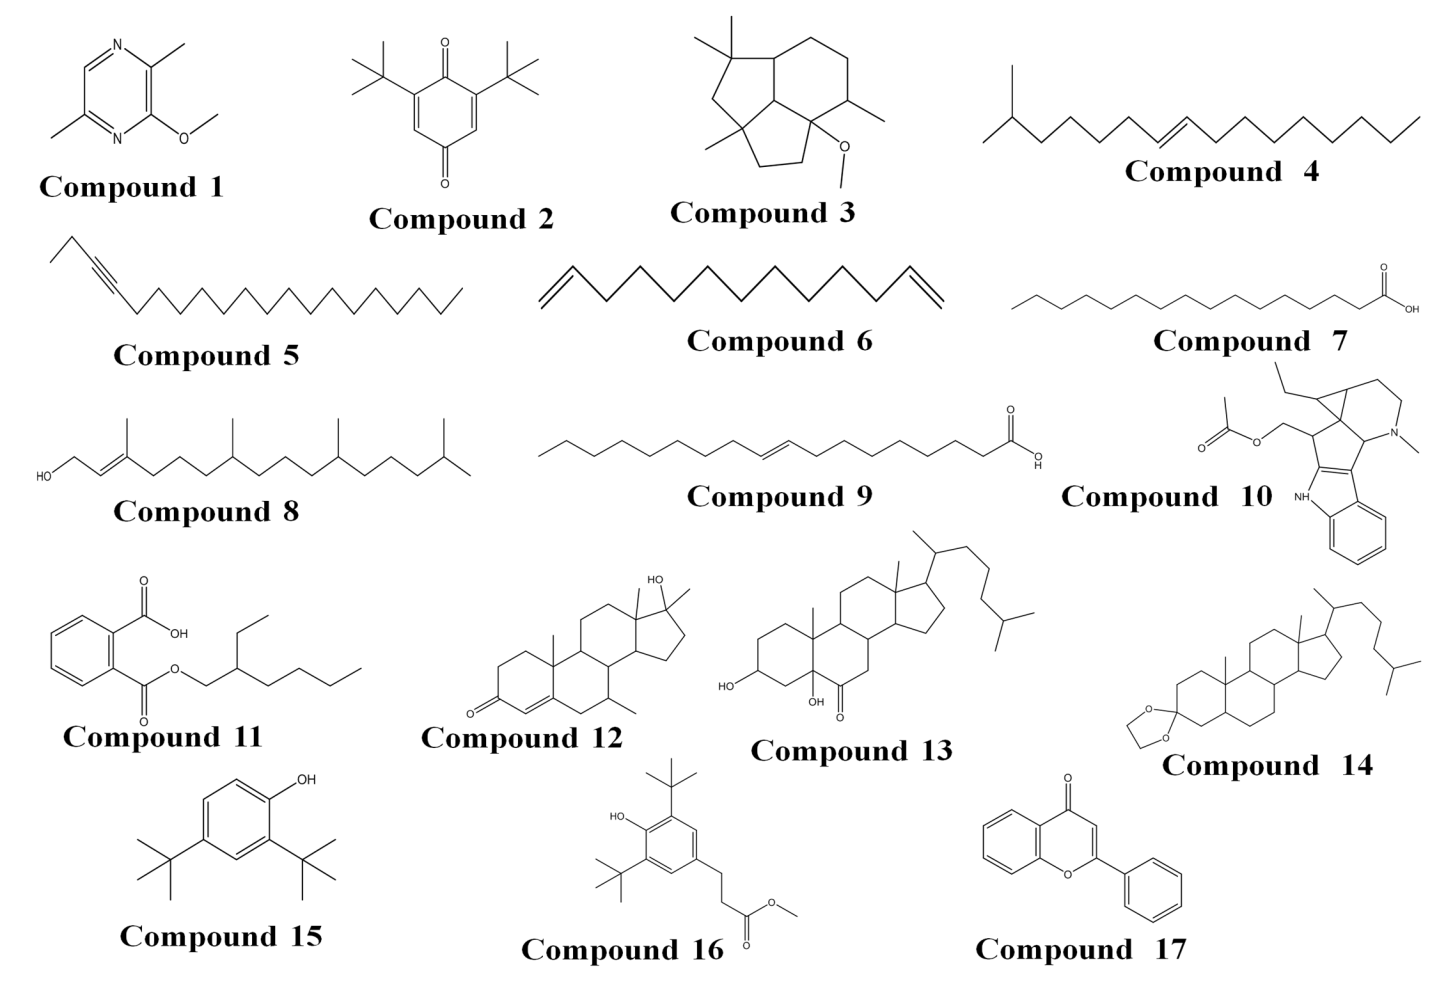


**Supplement figure** **2**: structure of the identified compounds.


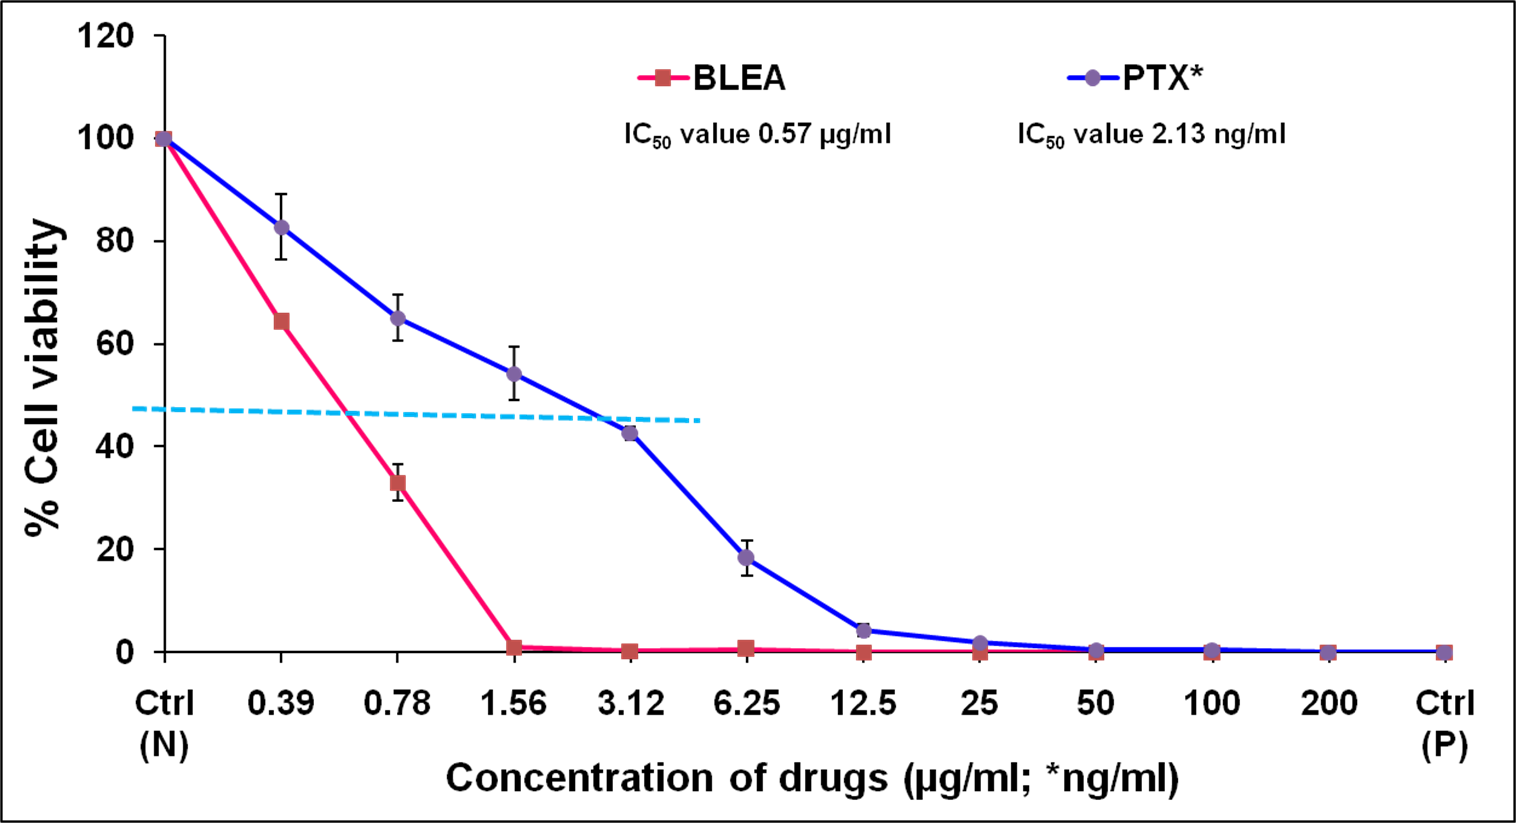


**Supplement figure** **3**: the cytotoxicity of PTX and BLEA in MCF-7 cells.


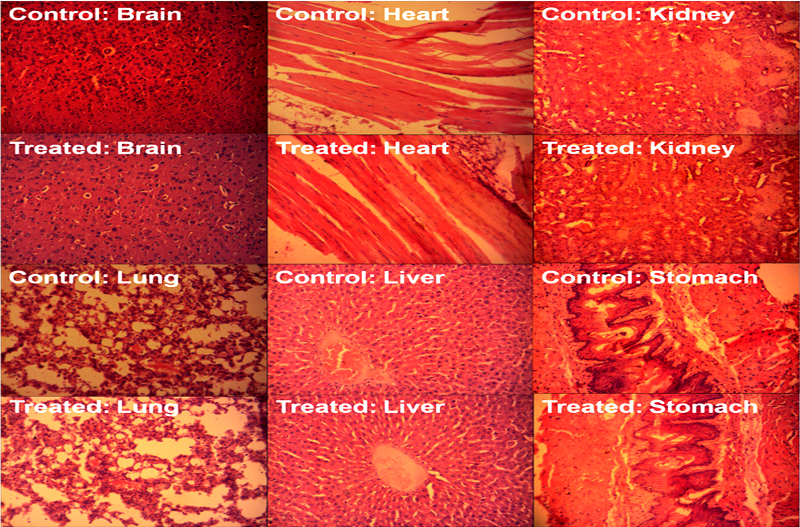


**Supplement figure** **4**: Histological evaluation of toxicity of BLEA in different vital organs. HE staining was done to visualize the cellular architecture of different tissues of control and treated groups.


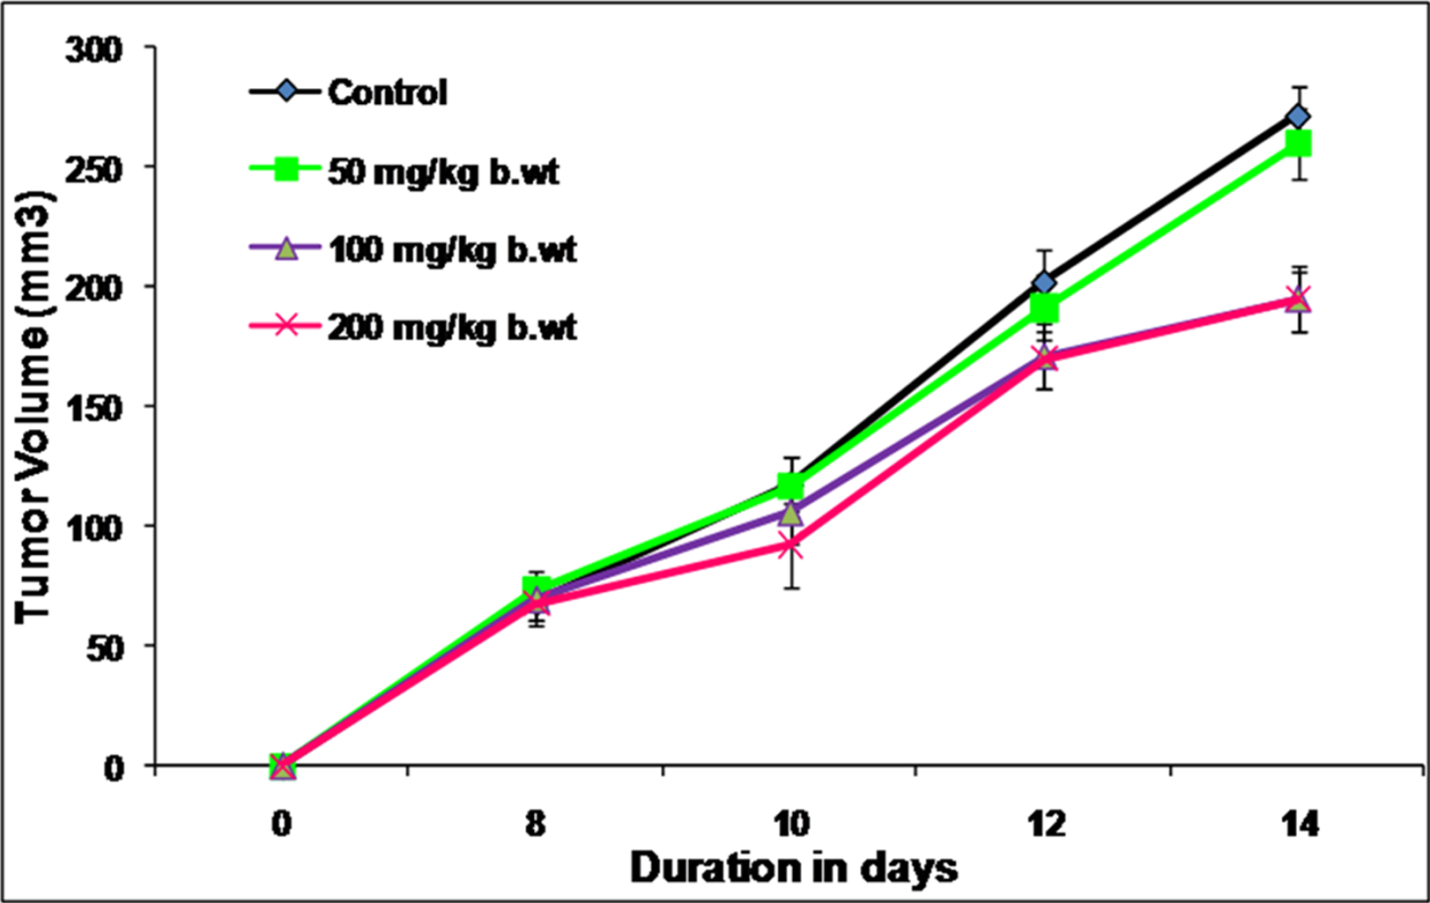


**Supplement figure** **5**: Effective dose determination of BLEA using different doses (50, 100 and 200 mg/kg b. wt.) in comparison of control (pilot study).
